# Supplementary material for: Alleviation of drought stress by root-applied thiourea is related to elevated photosynthetic pigments, osmoprotectants, antioxidant enzymes, and tubers yield and suppressed oxidative stress in potatoes cultivars
Source: PeerJ. 2022 Apr 7;10:e13121. doi: 10.7717/peerj.13121 (PMC8995019; doi:10.7717/peerj.13121)
Supplement: Supplemental Information 1 [file peerj-10-13121-s001.xlsx]

## Sheet: Tubers  dry weight  
Sr. No	Variety	Stages	Stress 0, 65 % drought	Treatments 0,0.5, 0.75 mM	Replicates		Treatments	Tubers fresh wt.(g)	tubers fresh wt	SD	S.E
1	White-Potato 1	1	1	1	1		control	15.13	17.1167	2.05841	1.18983						Cd	% Increase	% increase
2	1	1	1	1	2			16.98									%decrease	0.5mM	0.75 mM
3	1	1	1	1	3			19.24						0 mM TU	0.5 mM TU	0.75 mM TU	13.6319	-8.87311	-12.7129
4	1	1	1	2	1		Thiourea 0.5 rooting media	19.13	18.7833	0.697878	0.403398	Potato-SH-5	Control	17.1167	18.7833	26.22
5	1	1	1	2	2			17.98					Drought	14.7833	17.1167	22.8867
6	1	1	1	2	3			19.24				Potato-FD.73-110	Control	16.45	18.7833	25.5533	22.2898	-14.197	-14.3491
7	1	1	1	3	1		Thiourea 0.75 mM	26.09	26.22	0.941754	0.544366		Drought	12.7833	16.1167	21.8867
8	1	1	1	3	2			25.35					S.E	1.18983	0.904219	1.39733	0.904219
9	1	1	1	3	3			27.22						0.403398	1.4779	0.403398	1.08095
10	1	2	2	1	1		Drought 65 %	13.13	14.7833	1.98167	1.14548			0.544366	1.27564	0.271266	0.400572
11	1	2	2	1	2			16.98
12	1	2	2	1	3			14.24
13	1	2	2	2	1		Drought + 0.5 Tu	19.13	17.1167	2.55676	1.4779
14	1	2	2	2	2			17.98
15	1	2	2	2	3			14.24
16	1	2	2	3	1		Drought + 0.75 Tu	21.09	22.8867	2.20686	1.27564
17	1	2	2	3	2			25.35
18	1	2	2	3	3			22.22
19	Red-Potato 2	1	1	1	1		control	15.13	16.45	2.41737	1.39733
20	2	1	1	1	2			14.98
21	2	1	1	1	3			19.24
22	2	1	1	2	1		Thiourea 0.5 rooting media	19.13	18.7833	0.697878	0.403398
23	2	1	1	2	2			17.98
24	2	1	1	2	3			19.24
25	2	1	1	3	1		Thiourea 0.75 mM	26.09	25.5533	0.46929	0.271266
26	2	1	1	3	2			25.35
27	2	1	1	3	3			25.22
28	2	2	2	1	1		Drought 65 %	11.13	12.7833	1.5643	0.904219
29	2	2	2	1	2			12.98
30	2	2	2	1	3			14.24
31	2	2	2	2	1		Drought + 0.5 Tu	16.13	16.1167	1.87004	1.08095
32	2	2	2	2	2			17.98
33	2	2	2	2	3			14.24
34	2	2	2	3	1		Drought + 0.75 Tu	21.09	21.8867	0.692989	0.400572
35	2	2	2	3	2			22.35
36	2	2	2	3	3			22.22

## Sheet: Tubers  fresh weight 
Sr. No	Variety	Stages	Stress 0, 65 % drought	Treatments 0,0.5, 0.75 mM	Replicates		Treatments	Tubers fresh wt.(g)	tuber fresh wt	SD	S.E
1	White-Potato 1	1	1	1	1		control	24.13	26.45	2.43181	1.40567						Cd	% Increase	% increase
2	1	1	1	1	2			28.98									%decrease	0.5mM	0.75 mM
3	1	1	1	1	3			26.24						0 mM TU	0.5 mM TU	0.75 mM TU	18.765	-22.2318	-7.42212
4	1	1	1	2	1		Thiourea 0.5 rooting media	30.12	31.0967	1.63139	0.943	Potato-SH-5	Control	26.45	31.0967	31.8867
5	1	1	1	2	2			32.98					Drought	21.4867	24.1833	29.52
6	1	1	1	2	3			30.19				Potato-FD.73-110	Control	24.45	26.43	28.5533	16.21	-8.50044	3.38548
7	1	1	1	3	1		Thiourea 0.75 mM	32.09	31.8867	1.57488	0.910333		Drought	20.4867	24.1833	29.52
8	1	1	1	3	2			33.35					S.E	1.40567	1.74525	0.397837	1.74525
9	1	1	1	3	3			30.22						0.943	1.44127	0.915432	0.927927
10	1	2	2	1	1		Drought 65 %	14.44	21.4867	8.47443	4.89852			0.910333	1.42187	1.41119	1.42187
11	1	2	2	1	2			19.13
12	1	2	2	1	3			30.89
13	1	2	2	2	1		Drought + 0.5 Tu	26.89	24.1833	2.4934	1.44127
14	1	2	2	2	2			23.68
15	1	2	2	2	3			21.98
16	1	2	2	3	1		Drought + 0.75 Tu	26.68	29.52	2.45984	1.42187
17	1	2	2	3	2			30.9
18	1	2	2	3	3			30.98
19	Red-Potato 2	1	1	1	1		control	24.13	24.45	0.688259	0.397837
20	2	1	1	1	2			23.98
21	2	1	1	1	3			25.24
22	2	1	1	2	1		Thiourea 0.5 rooting media	28.12	26.43	1.5837	0.915432
23	2	1	1	2	2			24.98
24	2	1	1	2	3			26.19
25	2	1	1	3	1		Thiourea 0.75 mM	31.09	28.5533	2.44136	1.41119
26	2	1	1	3	2			28.35
27	2	1	1	3	3			26.22
28	2	2	2	1	1		Drought 65 %	19.44	20.4867	3.01928	1.74525
29	2	2	2	1	2			18.13
30	2	2	2	1	3			23.89
31	2	2	2	2	1		Drought + 0.5 Tu	22.89	24.1833	1.60531	0.927927
32	2	2	2	2	2			23.68
33	2	2	2	2	3			25.98
34	2	2	2	3	1		Drought + 0.75 Tu	26.68	29.52	2.45984	1.42187
35	2	2	2	3	2			30.9
36	2	2	2	3	3			30.98

## Sheet: Plant height 
Sr. No	Variety	Stress 0, 65 % drought	Treatments 0,0.5, 0.75 mM	Replicates	Treatments SH5	plant height (cm)	Mean	SD	S.E
1	White-Potato 1	1	1	1	control	19	19	1	0.578035						Cd	% Increase	% increase
2	1	1	1	2		20									%decrease	0.5mM	0.75 mM
3	1	1	1	3		18						0 mM TU	0.5 mM TU	0.75 mM TU	32.3529	-15.7407	-0.826446
4	1	1	2	1	Thiourea 0.5 rooting media	21.5	20.75	0.901388	0.521033	Potato-SH-5	Control	17	18	20.1667
5	1	1	2	2		19.75					Drought	11.5	15.1667	20
6	1	1	2	3		21				Potato-FD.73-110	Control	14	15	18	15.4762	1.66667	0
7	1	1	3	1	Thiourea 0.75 mM	20	20.1667	0.763763	0.441481		Drought	11.8333	15.25	18
8	1	1	3	2		21					S.E	0.578035	0.727344	0.578035	0.727344
9	1	1	3	3		19.5						0.521033	0.166864	0.764668	0.250296
10	1	2	1	1	Drought 65 %	12	11.5	0.866025	0.500593			0.441481	0	0.333728	0
11	1	2	1	2		12
12	1	2	1	3		10.5
13	1	2	2	1	Drought + 0.5 Tu	15	15.1667	0.288675	0.166864
14	1	2	2	2		15.5
15	1	2	2	3		15
16	1	2	3	1	Drought + 0.75 Tu	20	20	0	0
17	1	2	3	2		20
18	1	2	3	3		20
19	Red-Potato 2	1	1	1	control FB-73	20	21	1	0.578035
20	2	1	1	2		22
21	2	1	1	3		21
22	2	1	2	1	Thiourea 0.5 rooting media	20	21.5	1.32288	0.764668
23	2	1	2	2		22
24	2	1	2	3		22.5
25	2	1	3	1	Thiourea 0.75 mM	20	20.3333	0.57735	0.333728
26	2	1	3	2		20
27	2	1	3	3		21
28	2	2	1	1	Drought 65 %	12	11.8333	1.25831	0.727344
29	2	2	1	2		13
30	2	2	1	3		10.5
31	2	2	2	1	Drought + 0.5 Tu	15	15.25	0.433013	0.250296
32	2	2	2	2		15
33	2	2	2	3		15.75
34	2	2	3	1	Drought + 0.75 Tu	25	25	0	0
35	2	2	3	2		25
36	2	2	3	3		25

## Sheet: Data 
Sr. No	Variety	Stages	Stress 0, 65 % drought	Treatments 0,0.5, 0.75 mM	Replicates		Treatments	plant height (cm)	Mean	No.of leaves/plant	Mean	Leaf area(cm2)	Mean	RWC	Mean	Carotenoids	Mean	SOD	Mean	Chlorophyll (a,b,c)			Mean	H2O2	Mean	MDA, 532nm	Mean	anthocyanin, 530nm	Mean	TS Sugars , 625	Mean	phenolics, 765	Mean	Flavenoids, 510nm	Mean	Total soluble protein, 595	Mean	TAA, 570	Mean	Proline , 520	Mean	CAT,20	40	60	80	100	120	Mean	POD, 470
1	White-Potato 1	1	1	1	1		control	22	21	30	32	0.97	0.969	64.75	64.6367	0.49	0.88	0.09	0.18	1.113	0.12	0.129	0.4486	1.35	1.32	1.04	1.06333	0.986	0.622	15.251	10.6635	0.334	0.500667	1.321	1.48467	1.086	0.92	0.133	0.278667	1.274	2.90781								1.035
2	1	1	1	1	2			21		32		0.969		64.85		0.42		0.08		1.125	0.26	0.436		1.26		1.07		0.031		15.245		0.723		1.411		1.198		0.216		2.204		1.263	1.312	1.462	1.487	1.513	1.524	1.5205	1.043
3	1	1	1	1	3			20		34		0.968		64.31		0.52		0.07		1.116	0.244	0.445		1.35		1.08		0.849		1.4946		0.445		1.722		0.476		0.487		2.351		1.211	1.242	1.372	1.421	1.544	1.675		1.911
4	1	1	1	2	1		Thiourea 0.5 rooting media	21.5	21.0833	31	31	0.955	0.952	64.78	63.8067	0.53	0.62	0.04	0.25	1.83	0.132	0.138	0.622	1.87	1.79667	1.237	1.23533	0.562	0.641333	14.694	15.28	0.396	6.1748	1.133	1.36533	1.561	0.875	0.352	0.597	1.245	3.60409	1.523	1.624	1.613	1.744	1.864	1.928		1.866
5	1	1	1	2	2			20.75		29		0.95		63.53		0.42		0.05		1.121	0.125	0.349		1.79		1.212		0.496		15.467		0.223		1.942		1.033		0.442		1.249		1.123	1.295	1.311	1.344	1.386	1.384	1.22475	1.379
6	1	1	1	2	3			21		33		0.951		63.11		0.52		0.07		1.124	0.186	0.661		1.73		1.257		0.866		15.679		0.281		1.021		0.031		0.997		1.931		0.563	0.652	0.688	0.784	0.844	0.986		1.315
7	1	1	1	3	1		Thiourea 0.75 mM	23	21.1667	30	27	0.951	0.938333	63.76	64.1233	0.58	0.53	0.08	0.29	1.938	0.934	0.843	0.9292	1.55	1.58667	1.471	1.32433	0.689	0.670333	15.124	14.992	0.244	6.257	0.997	1.31133	0.353	0.492	0.093	0.400667	2.987	3.65162	0.739	0.735	0.753	0.746	0.886	0.969		1.091
8	1	1	1	3	2			21		29		0.949		63.71		0.82		0.03		1.255	0.144	0.486		1.66		1.224		0.535		15.365		0.223		1.244		1.101		0.988		2.835		0.634	0.735	0.855	0.884	0.836	0.904	0.897375	1.933
9	1	1	1	3	3			19.5		22		0.915		64.9		0.91		0.09		0.242	0.253	0.445		1.55		1.278		0.787		14.487		0.702		1.693		0.022		0.121		1.385		0.573	0.695	0.752	0.751	0.773	0.895		1.369
10	1	2	2	1	1		Drought 65 %	12	12.8333	18	21	0.64	0.661667	64.81	64.6567	0.58	0.74	0.01	0.21	0.152	0.314	0.386	0.2582	2.78	2.75667	1.136	1.19067	0.76	0.857	15.937	15.539	0.673	6.6948	2.212	2.12867	2.272	2.06567	0.041	0.063	2.424	4.19555	1.038	1.183	1.273	1.333	1.441	1.436		1.355
11	1	2	2	1	2			13		20		0.67		64.78		0.45		0.02		1.122	0.175	0.272		2.83		1.212		0.86		14.699		0.953		2.091		1.937		0.132		2.334		1.472	1.524	1.655	1.686	1.702	1.748	1.541	1.133
12	1	2	2	1	3			13.5		25		0.675		64.38		0.59		0.01		1.236	0.161	0.167		2.66		1.224		0.951		15.981		0.372		2.083		1.988		0.016		2.158		1.242	1.335	1.428	1.582	1.583	1.654		1.116
13	1	2	2	2	1		Drought + 0.5 Tu	12	12.5	20	22.3333	0.865	0.851667	64.55	64.6967	0.72	0.92	0.01	0.12	1.989	0.879	0.836	0.8998	1.65	1.60667	0.387	0.423667	0.369	0.426333	15.631	14.6873	0.791	6.54927	2.127	2.17267	2.793	2.61233	0.182	0.483667	1.939	4.13771	0.783	0.793	0.864	0.874	0.876	0.887		1.615
14	1	2	2	2	2			12.5		25		0.85		64.66		0.85		0.02		1.144	0.15	0.454		1.64		0.462		0.465		14.188		0.648		2.198		2.932		0.272		1.894		0.334	0.343	0.475	0.564	0.675	0.792	0.553625	1.792
15	1	2	2	2	3			13		22		0.84		64.88		0.59		0.03		1.431	0.24	0.341		1.53		0.422		0.445		14.243		0.989		2.193		2.112		0.997		1.928		0.424	0.457	0.547	0.536	0.556	0.655		1.143
16	1	2	2	3	1		Drought + 0.75 Tu	14	15.6667	26	27.3333	0.89	0.855	66.71	64.49	0.82	0.88	0.04	0.15	1.948	0.776	0.387	0.7378	1.46	1.55333	0.196	0.280333	0.993	0.904333	15.348	15.403	0.754	6.3816	2.988	2.26133	2.223	1.81633	0.112	0.319	2.017	4.12871	0.215	0.384	0.445	0.495	0.567	0.591		1.791
17	1	2	2	3	2			16		27		0.825		64.88		0.87		0.05		1.967	0.785	0.344		1.59	.	0.314		0.921		14.923		0.242		1.997		1.244		0.081		2.019		0.579	0.624	0.658	0.544	0.684	0.784	0.629714	1.137
18	1	2	2	3	3			17		29		0.85		61.88		0.9		0.06		1.155	0.129	0.234		1.61		0.331		0.799		15.938		0.161		1.799		1.982		0.764		2.031		0.42	0.133	0.241	0.384	0.613	O.683		1.931
19	Red-Potato 2	1	1	1	1		control	20	21	30	26.6667	0.949	0.950333	62.66	65.1433	0.71	0.84	0.08	0.18	1.869	0.797	0.733	0.7826	1.74	1.5	0.288	0.247	0.728	0.663	15.036	14.868	0.948	8.5386	1.632	1.318	0.998	1.32333	0.091	0.136667	2.916	4.12166	0.34	0.224	0.235	0.472	0.543	0.535		1.413
20	2	1	1	1	2			22		25		0.951		66.33		0.76		0.08		1.043	0.816	0.216		1.39		0.219		0.982		15.479		0.871		1.319		0.976		0.077		2.841		0.452	0.514	0.581	0.669	0.745	0.785	0.652	1.264
21	2	1	1	1	3			21		25		0.951		66.44		0.73		0.09		1.74	0.896	0.298		1.37		0.234		0.279		14.089		10.97		1.003		1.996		0.242		2.935		0.36	0.412	0.961	0.733	0.632	0.636		1.674
22	2	1	1	2	1		Thiourea 0.5 rooting media	21	21.8333	25	24.6667	0.95	0.946333	66.44	65.7233	0.55	1.11	0.06	0.15	2.153	0.167	0.781	0.7424	1.64	1.41333	0.069	0.0386667	0.017	0.367333	15.773	15.3847	0.994	6.51533	1.113	1.25933	1.187	1.378	0.193	0.507667	1.822	3.79346	0.74	0.755	0.766	0.782	0.796	0.834		1.345
23	2	1	1	2	2			22		27		0.949		65.31		0.75		0.04		1.278	0.278	0.356		1.65		0.023		0.871		14.549		0.152		1.313		1.845		0.566		1.833		0.499	0.511	0.511	0.524	0.691	O.733	0.537429	1.208
24	2	1	1	2	3			22.5		22		0.94		65.42		0.78		0.05		1.153	0.178	0.255		0.95		0.024		0.214		15.832		0.273		1.352		1.102		0.764		1.355		0.321	0.352	0.477	0.425	0.473	0.569		1.027
25	2	1	1	3	1		Thiourea 0.75 mM	23	22.5	25	26.3333	0.949	0.949333	63.51	63.39	0.89	0.81	0.09	0.18	1.251	0.989	0.134	0.6302	1.63	1.29	0.298	0.453667	0.442	0.561	14.993	15.5997	0.979	6.53913	1.013	1.14933	1.271	1.19367	0.924	0.890667	1.933	3.87788	0.391	0.244	0.379	0.441	0.431	0.457		1.329
26	2	1	1	3	2			23.5		28		0.951		63.23		0.75		0.08		1.187	0.967	0.44		1.45		0.554		0.982		15.834		0.812		1.214		1.112		0.763		1.953		0.425	0.428	0.429	0.449	0.459	0.547	0.510375	1.235
27	2	1	1	3	3			21		26		0.948		63.43		0.83		0.06		1.152	0.232	0.337		0.79		0.509		0.259		15.972		0.312		1.221		1.198		0.985		1.974		0.411	0.325	0.438	0.553	0.622	0.655		1.464
28	2	2	2	1	1		Drought 65 %	12	12.5	20	22.3333	0.645	0.648333	63.11	63.96	0.87	0.76	0.04	0.24	1.143	0.235	0.012	0.5004	1.75	1.9	0.189	0.193	0.984	0.902667	15.288	14.8287	0.892	6.54733	1.935	1.96367	1.997	1.93467	0.232	0.416667	1.913	3.93885	0.17	0.315	0.408	0.413	0.465	0.691		1.565
29	2	2	2	1	2			13		25		0.649		64.55		0.61		0.03		1.143	10.62	0.923		1.97		0.198		0.897		14.974		0.782		1.833		1.944		0.231		1.281		0.55	0.561	0.577	0.594	0.617	0.619	0.594	1.175
30	2	2	2	1	3			12.5		22		0.651		64.22		0.81		0.05		1.146	0.98	0.189		1.98		0.192		0.827		14.224		0.946		2.123		1.863		0.787		1.976		0.49	0.406	0.544	0.436	0.574	0.635		1.164
31	2	2	2	2	1		Drought + 0.5 Tu	13	12.5833	21	20.3333	0.845	0.858667	65.76	65.9967	0.57	0.71	0.03	0.23	1.761	0.451	0.769	0.9224	1.98	1.83	0.322	0.333	0.56	0.79	15.769	15.096	0.643	6.5022	2.135	2.07267	2.031	1.96	0.214	0.537667	2.89	4.28466	0.38	0.322	0.343	0.463	0.596	0.599		1.929
32	2	2	2	2	2			12		20		0.865		65.25		0.58		0.03		1.734	0.568	0.89		1.76		0.504		0.94		14.876		0.421		1.891		1.907		0.633		2.92		0.423	0.455	0.455	0.461	0.484	0.499	0.499625	1.122
33	2	2	2	2	3			12.75		20		0.866		66.98		0.67		0.02		2.166	0.976	0.741		1.75		0.173		0.87		14.778		0.582		2.192		1.942		0.766		2.93		0.232	0.544	0.327	0.347	0.442	0.466		1.469
34	2	2	2	3	1		Drought + 0.75 Tu	13	13.5	27	24.6667	0.85	0.849	65.66	66.2533	0.64	0.58	0.07	0.27	1.219	0.209	0.235	0.517	1.43	1.35333	0.554	0.356	0.999	0.815333	14.667	14.815	0.942	6.398	1.271	1.71467	1.341	1.526	0.214	0.464	2.97	3.97559	0.26	0.263	0.277	0.535	0.664	0.754		1.911
35	2	2	2	3	2			13.5		26		0.849		66.33		0.68		0.08		1.278	0.267	0.769		1.35		0.248		0.891		14.741		0.845		2.091		1.954		0.191		2.89		0.398	0.411	0.403	0.405	0.416	0.436	0.431375	1.135
36	2	2	2	3	3			14		21		0.848		66.77		0.62		0.07		1.261	0.314	0.153		1.28		0.266		0.556		15.037		0.721		1.782		1.283		0.987		2.47		0.33	0.384	0.477	0.413	0.447	0.544		1.909
																																										0.39	0.163	0.379	0.399	0.433	0.438
[truncated: 1 more columns]

## Sheet: statistical sheet 
serial no	Cultivar	Stress	treatments,	Replicates	plant height (cm)	No.of leaves/plant	Leaf area(cm2)	RWC	Chl a	Chl b	Tot-Chl	Carotenoids	[MDA(532)-MDA(600)/155000]1000000/.1nmol.ml-1(1g)	H2O2 (µmol/g FW)	mg/g TA Eq. Phenolics	TS/ proline s mg/g FW	TS Proteins mg/g FW	Antho	T.Soluble sugars	RMP	units/mg protein CAT	POD	SOD
1	1	1	1	1	19	22	0.311	64.05	3.45308	3.45308	3.83757	0.429	62.0645	1.998	114.017	7.649	10.649	1.19419	136.807	40.3699	85.0404	17.2443	15.3581
2	1	1	1	2	20	22	0.319	64.05	3.39703	3.39703	3.56863	0.436	63.2903	1.988	118.933	7.869	10.869	1.01512	138.739	40.6667	85.304	17.6494	12.0385
3	1	1	1	3	18	20	0.318	64.1	3.37921	3.37921	3.46978	0.445	64.0645	1.998	115.767	9.649	9.649	1.17558	135.798	40.7122	85.1084	17.1846	10.865
4	1	1	2	1	21.5	20	0.455	64.68	4.72148	3.72148	4.33575	0.538	53.0645	1.428	155.017	12.489	13.489	2.01047	237.563	50.3699	125.072	30.3031	19.9346
5	1	1	2	2	19.75	25	0.435	64.73	4.47511	3.47511	4.87885	0.549	53.2903	1.448	150.6	12.119	12.119	2.0593	228.992	50.6667	123.394	30.6967	19.7111
6	1	1	2	3	21	25	0.431	64.71	4.44362	3.44362	4.19292	0.541	54.0544	1.468	157.1	12.099	12.099	2.1686	223.697	50.7122	123.817	30.9465	14.3309
7	1	1	3	1	20	30	0.651	65.56	5.92504	4.52503	5.60239	0.643	44.2345	1.108	189.85	18.419	16.419	2.89884	253.025	69.3699	150.993	45.9431	30.9994
8	1	1	3	2	21	28	0.549	65.41	5.98779	4.88779	5.24348	0.686	43.2303	1.118	180.6	15.609	16.609	2.47326	263.025	62.6667	153.537	40.6826	25.924
9	1	1	3	3	19.5	29	0.515	65.49	5.59821	4.59821	5.76286	0.645	44.3456	1.108	180.517	15.159	17.159	2.26163	261.513	65.7122	159.924	41.3901	28.7999
10	1	2	1	1	12	18	0.34	62.78	3.45308	3.27143	3.2046	0.376	64.2581	2.538	134.767	13.609	12.609	2.17791	188.908	60.3699	110.402	22.103	17.1869
11	1	2	1	2	12	18	0.37	62.8	3.39703	3.44466	3.23336	0.372	63.9677	2.588	135.6	13.159	13.159	2.3314	183.866	62.6667	110.77	20.0241	15.3126
12	1	2	1	3	10.5	15	0.375	63.88	3.37921	3.81603	3.23123	0.377	63.9225	2.618	135.517	13.669	13.669	2.11047	192.269	60.7122	112.242	26.1848	15.8864
13	1	2	2	1	15	20	0.665	64.25	5.72395	4.72395	6.4269	0.536	54.8387	1.908	161.267	18.719	18.719	2.98023	205.042	69.3699	171.276	30.9376	24.7168
14	1	2	2	2	15.5	25	0.65	64.36	5.53132	4.53132	6.05122	0.554	54.8387	1.958	169.35	15.009	18.009	2.99884	276.134	72.6667	171.741	37.5191	21.6104
15	1	2	2	3	15	22	0.64	64.38	4.38203	4.38203	6.08115	0.541	50.8387	1.888	164.433	15.009	17.009	2.9593	264.79	75.7122	171.832	40.5883	26.2862
16	1	2	3	1	20	26	0.79	65.99	6.66304	6.66304	7.82454	0.687	41.9355	0.918	194.85	20.119	21.119	3.23605	332.101	89.3699	198.188	40.2642	31.323
17	1	2	3	2	20	27	0.725	64.98	6.71731	6.71731	7.90809	0.644	40.1613	0.948	192.183	20.229	20.229	3.55233	327.563	82.6667	190.727	44.7305	34.0323
18	1	2	3	3	20	29	0.785	64.98	6.58037	6.58037	7.96723	0.634	40.8065	0.968	180.35	20.609	19.609	3.15698	335.378	85.7122	192.543	47.5554	33.1428
19	2	1	1	1	20	22	0.349	64.66	3.39809	3.39809	3.77219	0.233	61.7419	1.898	145.933	9.669	9.669	1.1686	160.84	40.3699	90.3708	20.6643	12.8043
20	2	1	1	2	22	21	0.351	64.33	2.76277	3.76276	3.21202	0.216	60.5806	1.948	141.517	8.649	8.649	1.50581	130.42	42.6667	85.1913	15.713	12.8328
21	2	1	1	3	21	23	0.351	64.44	3.92194	3.92194	3.0135	0.298	60.7097	1.928	148.183	8.749	10.749	1.36628	135.798	45.7122	97.8894	20.8105	10.7665
22	2	1	2	1	20	25	0.495	65.34	5.52347	4.72347	4.16012	0.481	50.2258	1.278	168.183	12.759	15.759	2.04535	218.235	59.3699	128.254	35.2052	22.8594
23	2	1	2	2	22	27	0.449	65.21	5.4707	4.8707	4.96629	0.456	50.7742	1.288	166.35	13.639	15.639	2.08721	214.79	52.6667	123.814	35.7446	27.9281
24	2	1	2	3	22.5	22	0.494	65.22	5.54107	4.54107	4.21066	0.455	51.0968	1.638	168.1	13.909	14.909	2.03372	210.588	55.7122	121.166	33.049	26.4652
25	2	1	3	1	20	25	0.649	66.31	6.30682	5.30682	6.5027	0.634	42.7742	0.988	183.6	18.399	18.399	2.87326	227.395	75.3699	150.198	40.6739	31.4817
26	2	1	3	2	20	28	0.651	65.33	6.11842	5.11842	6.26328	0.644	41.7784	0.958	181.35	18.009	18.009	2.91047	278.992	70.6667	157.343	40.1761	33.054
27	2	1	3	3	21	26	0.548	65.43	6.50158	5.50158	6.48136	0.637	48.4516	0.748	184.683	18.869	18.869	2.8686	280.84	65.7122	152.006	40.9974	30.7025
28	2	2	1	1	12	15	0.345	65.11	3.47099	3.47099	3.47846	0.212	58.9032	2.608	129.683	13.759	12.759	2.17791	180.756	60.3699	92.0913	26.8032	19.1268
29	2	2	1	2	13	16	0.349	65.55	3.51293	3.51293	3.92272	0.223	58.3871	2.628	128.85	13.229	15.229	2.17326	183.613	62.6667	120.977	22.4687	22.4925
30	2	2	1	3	10.5	19	0.351	65.22	3.9795	3.9795	3.24673	0.289	57.6774	2.648	125.017	13.619	16.619	2.11744	187.815	65.7122	108.481	24.3752	21.7243
31	2	2	2	1	15	21	0.545	65.76	5.28788	5.28788	5.80835	0.469	43.8065	1.938	155.6	17.899	19.899	2.56395	285.378	79.3699	158.913	30.4037	26.2716
32	2	2	2	2	15	20	0.565	65.25	5.12347	5.12347	5.34507	0.469	45.6774	1.918	157.1	17.759	19.759	2.56395	256.303	72.6667	158.581	30.7923	24.9172
33	2	2	2	3	15.75	25	0.666	65.98	5.22069	5.22069	5.27163	0.441	47.3226	1.908	159.683	17.209	16.209	2.72674	234.79	75.7122	156.507	27.0823	27.9867
34	2	2	3	1	25	27	0.75	65.66	6.72977	6.72977	7.49955	0.735	39.2903	1.108	184.683	19.289	21.289	3.65698	326.387	89.3699	200.392	36.1523	36.0229
35	2	2	3	2	25	26	0.749	66.33	6.87809	6.87809	7.91074	0.769	39.2903	0.998	185.767	19.229	24.229	3.22674	321.345	81.934	209.284	38.2315	34.6327
36	2	2	3	3	25	21	0.748	66.77	6.79251	6.79251	7.114	0.753	31.2903	0.948	187.1	20.319	20.319	3.59884	337.815	81.243	204.627	39.5537	30.7041
																		3.25	485.378			23.2718	13.0038
																		3.20349	456.303			29.2488	17.1332
																		3.30814	434.79			29.2909	16.3935
																		3.49419	486.387			33.425	18.579
																		3.11047	461.345			38.0858	20.4298
																		3.30814				36.9738	16.2258
																		3.91279				52.8961	13.8087
																		3.73837				50.8347	14.7866
																		3.22674				60.8979	11.6841
																		4.07558				45.635	18.9795
																		3.90116				42.3376	26.0343
																		3.42442				43.8662	24.8357

## Sheet: number of leaves 
Sr. No	Variety	Stages	Stress 0, 65 % drought	Treatments 0,0.5, 0.75 mM	Replicates		Treatments	No.of leaves/plant	leaves	SD	S.E
1	White-Potato 1	1	1	1	1		control	22	21.3333	1.1547	0.667457						Cd	% Increase	% increase
2	1	1	1	1	2			22									%decrease	0.5mM	0.75 mM
3	1	1	1	1	3			20						0 mM TU	0.5 mM TU	0.75 mM TU	20.3125	-4.28571	-5.74713
4	1	1	1	2	1		Thiourea 0.5 rooting media	20	23.3333	2.88675	1.66864	Potato-SH-5	Control	21.3333	23.3333	29
5	1	1	1	2	2			25					Drought	17	22.3333	27.3333
6	1	1	1	2	3			25				Potato-FD.73-110	Control	22	24.6667	26.3333	24.2424	-10.8108	-6.32911
7	1	1	1	3	1		Thiourea 0.75 mM	30	29	1	0.578035		Drought	16.6667	22	24.6667
8	1	1	1	3	2			28					S.E	0.667457	1.20328	0.578035	1.20328
9	1	1	1	3	3			29						1.66864	1.45469	1.45469	1.52934
10	1	2	2	1	1		Drought 65 %	18	17	1.73205	1.00119			0.578035	0.882963	0.882963	1.85812
11	1	2	2	1	2			18
12	1	2	2	1	3			15
13	1	2	2	2	1		Drought + 0.5 Tu	20	22.3333	2.51661	1.45469
14	1	2	2	2	2			25
15	1	2	2	2	3			22
16	1	2	2	3	1		Drought + 0.75 Tu	26	27.3333	1.52753	0.882963
17	1	2	2	3	2			27
18	1	2	2	3	3			29
19	Red-Potato 2	1	1	1	1		control	22	22	1	0.578035
20	2	1	1	1	2			21
21	2	1	1	1	3			23
22	2	1	1	2	1		Thiourea 0.5 rooting media	25	24.6667	2.51661	1.45469
23	2	1	1	2	2			27
24	2	1	1	2	3			22
25	2	1	1	3	1		Thiourea 0.75 mM	25	26.3333	1.52753	0.882963
26	2	1	1	3	2			28
27	2	1	1	3	3			26
28	2	2	2	1	1		Drought 65 %	15	16.6667	2.08167	1.20328
29	2	2	2	1	2			16
30	2	2	2	1	3			19
31	2	2	2	2	1		Drought + 0.5 Tu	21	22	2.64575	1.52934
32	2	2	2	2	2			20
33	2	2	2	2	3			25
34	2	2	2	3	1		Drought + 0.75 Tu	27	24.6667	3.21455	1.85812
35	2	2	2	3	2			26
36	2	2	2	3	3			21

## Sheet: leaf area
Sr. No	Variety	Stages	Stress 0, 65 % drought	Treatments 0,0.5, 0.75 mM	Replicates		Treatments	Leaf area(cm2)	leaf area	SD	S.E
1	White-Potato 1	1	1	1	1		control	0.311	0.316	0.0043589	0.00251959						Cd	% Increase	% increase
2	1	1	1	1	2			0.319									%decrease	0.5mM	0.75 mM
3	1	1	1	1	3			0.318						0 mM TU	0.5 mM TU	0.75 mM TU	17.1941	-12.5662	-12.5364
4	1	1	1	2	1		Thiourea 0.5 rooting media	0.455	0.440333	0.0128582	0.00743249	Potato-SH-5	Control	0.316	0.440333	0.571667
5	1	1	1	2	2			0.435					Drought	0.261667	0.385	0.5
6	1	1	1	2	3			0.431				Potato-FD.73-110	Control	0.350333	0.479333	0.616	29.1151	-25.1739	-32.5216
7	1	1	1	3	1		Thiourea 0.75 mM	0.651	0.571667	0.0707766	0.0409114		Drought	0.248333	0.358667	0.415667
8	1	1	1	3	2			0.549					S.E	0.00251959	0.00176593	0.000667457	0.00176593
9	1	1	1	3	3			0.515						0.00743249	0.0333311	0.0151874	0.00684754
10	1	2	2	1	1		Drought 65 %	0.24	0.261667	0.0189297	0.010942			0.0409114	0.012598	0.0340452	0.0338747
11	1	2	2	1	2			0.27
12	1	2	2	1	3			0.275
13	1	2	2	2	1		Drought + 0.5 Tu	0.365	0.385	0.0576628	0.0333311
14	1	2	2	2	2			0.45
15	1	2	2	2	3			0.34
16	1	2	2	3	1		Drought + 0.75 Tu	0.49	0.5	0.0217945	0.012598
17	1	2	2	3	2			0.525
18	1	2	2	3	3			0.485
19	Red-Potato 2	1	1	1	1		control	0.349	0.350333	0.0011547	0.000667457
20	2	1	1	1	2			0.351
21	2	1	1	1	3			0.351
22	2	1	1	2	1		Thiourea 0.5 rooting media	0.495	0.479333	0.0262742	0.0151874
23	2	1	1	2	2			0.449
24	2	1	1	2	3			0.494
25	2	1	1	3	1		Thiourea 0.75 mM	0.649	0.616	0.0588982	0.0340452
26	2	1	1	3	2			0.651
27	2	1	1	3	3			0.548
28	2	2	2	1	1		Drought 65 %	0.245	0.248333	0.00305505	0.00176593
29	2	2	2	1	2			0.249
30	2	2	2	1	3			0.251
31	2	2	2	2	1		Drought + 0.5 Tu	0.345	0.358667	0.0118462	0.00684754
32	2	2	2	2	2			0.365
33	2	2	2	2	3			0.366
34	2	2	2	3	1		Drought + 0.75 Tu	0.45	0.415667	0.0586032	0.0338747
35	2	2	2	3	2			0.449
36	2	2	2	3	3			0.348

## Sheet: RWC
Sr. No	Variety	Stages	Stress 0, 65 % drought	Treatments 0,0.5, 0.75 mM	Replicates		Treatments	RWC	RWC	SD	S.E
1	White-Potato 1	1	1	1	1		control	64.05	64.0667	0.0288675	0.0166864						Cd	% Increase	% increase
2	1	1	1	1	2			64.05									%decrease	0.5mM	0.75 mM
3	1	1	1	1	3			64.1						0 mM TU	0.5 mM TU	0.75 mM TU	1.4256	-0.582114	-0.259595
4	1	1	1	2	1		Thiourea 0.5 rooting media	64.68	64.7067	0.0251661	0.0145469	Potato-SH-5	Control	64.0667	64.7067	65.4867
5	1	1	1	2	2			64.73					Drought	63.1533	64.33	65.3167
6	1	1	1	2	3			64.71				Potato-FD.73-110	Control	64.4767	65.2567	65.69	3.38624	-3.97405	-3.20191
7	1	1	1	3	1		Thiourea 0.75 mM	65.56	65.4867	0.0750555	0.0433847		Drought	62.2933	62.6633	63.5867
8	1	1	1	3	2			65.41					S.E	0.0166864	0.623215	0.0971259	0.623215
9	1	1	1	3	3			65.49						0.0145469	0.0404624	0.0418161	0.554502
10	1	2	2	1	1		Drought 65 %	62.78	63.1533	0.629391	0.36381			0.0433847	0.337066	0.31171	0.491307
11	1	2	2	1	2			62.8
12	1	2	2	1	3			63.88
13	1	2	2	2	1		Drought + 0.5 Tu	64.25	64.33	0.07	0.0404624
14	1	2	2	2	2			64.36
15	1	2	2	2	3			64.38
16	1	2	2	3	1		Drought + 0.75 Tu	65.99	65.3167	0.583124	0.337066
17	1	2	2	3	2			64.98
18	1	2	2	3	3			64.98
19	Red-Potato 2	1	1	1	1		control	64.66	64.4767	0.168028	0.0971259
20	2	1	1	1	2			64.33
21	2	1	1	1	3			64.44
22	2	1	1	2	1		Thiourea 0.5 rooting media	65.34	65.2567	0.0723418	0.0418161
23	2	1	1	2	2			65.21
24	2	1	1	2	3			65.22
25	2	1	1	3	1		Thiourea 0.75 mM	66.31	65.69	0.539259	0.31171
26	2	1	1	3	2			65.33
27	2	1	1	3	3			65.43
28	2	2	2	1	1		Drought 65 %	61.11	62.2933	1.07816	0.623215
29	2	2	2	1	2			62.55
30	2	2	2	1	3			63.22
31	2	2	2	2	1		Drought + 0.5 Tu	63.76	62.6633	0.959288	0.554502
32	2	2	2	2	2			62.25
33	2	2	2	2	3			61.98
34	2	2	2	3	1		Drought + 0.75 Tu	62.66	63.5867	0.849961	0.491307
35	2	2	2	3	2			64.33
36	2	2	2	3	3			63.77

## Sheet: Chla 
Sr. No	Variety	Stages	Stress 0, 65 % drought	Treatments 0,0.5, 0.75 mM	Replicates		Treatments	Chl a	Chla	SD	S.E
1	White-Potato 1	1	1	1	1		control	3.15307	3.30977	0.135994	0.0786092						Cd	% Increase	% increase
2	1	1	1	1	2			3.39703									%decrease	0.5mM	0.75 mM
3	1	1	1	1	3			3.37921						0 mM TU	0.5 mM TU	0.75 mM TU	25.9837	-22.0151	-25.9854
4	1	1	1	2	1		Thiourea 0.5 rooting media	4.72148	4.54674	0.15215	0.0879481	Potato-SH-5	Control	3.30977	4.54674	5.83701
5	1	1	1	2	2			4.47511					Drought	2.44977	3.54577	4.32024
6	1	1	1	2	3			4.44362				Potato-FD-.73-110	Control	2.97644	4.2134	5.17035	28.8936	-20.5923	-19.0207
7	1	1	1	3	1		Thiourea 0.75 mM	5.92504	5.83701	0.209177	0.120911		Drought	2.11644	3.34577	4.18691
8	1	1	1	3	2			5.98779					S.E	0.0786092	0.587699	0.412201	0.587699
9	1	1	1	3	3			5.59821						0.0879481	0.479268	0.246421	0.659201
10	1	2	2	1	1		Drought 65 %	2.15307	2.44977	0.635366	0.367263			0.120911	0.302766	0.214951	0.435969
11	1	2	2	1	2			2.01702
12	1	2	2	1	3			3.17921
13	1	2	2	2	1		Drought + 0.5 Tu	2.72395	3.54577	0.829133	0.479268
14	1	2	2	2	2			3.53132
15	1	2	2	2	3			4.38203
16	1	2	2	3	1		Drought + 0.75 Tu	4.66304	4.32024	0.523785	0.302766
17	1	2	2	3	2			3.71731
18	1	2	2	3	3			4.58037
19	Red-Potato 2	1	1	1	1		control	2.15307	2.97644	0.713108	0.412201
20	2	1	1	1	2			3.39703
21	2	1	1	1	3			3.37921
22	2	1	1	2	1		Thiourea 0.5 rooting media	3.72148	4.2134	0.426308	0.246421
23	2	1	1	2	2			4.47511
24	2	1	1	2	3			4.44362
25	2	1	1	3	1		Thiourea 0.75 mM	4.92504	5.17035	0.371866	0.214951
26	2	1	1	3	2			4.98779
27	2	1	1	3	3			5.59821
28	2	2	2	1	1		Drought 65 %	1.15308	2.11644	1.01672	0.587699
29	2	2	2	1	2			2.01702
30	2	2	2	1	3			3.17921
31	2	2	2	2	1		Drought + 0.5 Tu	2.12395	3.34577	1.14042	0.659201
32	2	2	2	2	2			3.53132
33	2	2	2	2	3			4.38203
34	2	2	2	3	1		Drought + 0.75 Tu	4.66304	4.18691	0.754226	0.435969
35	2	2	2	3	2			3.31731
36	2	2	2	3	3			4.58037

## Sheet: Chl b 
Sr. No	Variety	Stages	Stress 0, 65 % drought	Treatments 0,0.5, 0.75 mM	Replicates		Treatments	Chl b	Mean chlb	SD	S.E
1	White-Potato 1	1	1	1	1		control	2.45308	2.7431	0.551597	0.318842						Cd	% Increase	% increase
2	1	1	1	1	2			2.39703									%decrease	0.5mM	0.75 mM
3	1	1	1	1	3			3.37921						0 mM TU	0.5 mM TU	0.75 mM TU	12.1517	-18.7966	-5.82798
4	1	1	1	2	1		Thiourea 0.5 rooting media	3.72148	3.54674	0.15215	0.0879481	Potato-SH-5	Control	2.7431	3.54674	4.00368
5	1	1	1	2	2			3.47511					Drought	2.40977	2.88007	3.77034
6	1	1	1	2	3			3.44362				Potato-FD.73-110	Control	3.36093	4.04508	4.64227	38.2184	-37.0411	-35.2973
7	1	1	1	3	1		Thiourea 0.75 mM	3.52503	4.00368	0.545892	0.315544		Drought	2.07644	2.54674	3.00368
8	1	1	1	3	2			3.88779					S.E	0.318842	0.349402	0.484181	0.349402
9	1	1	1	3	3			4.59821						0.0879481	0.290954	0.668412	0.0879481
10	1	2	2	1	1		Drought 65 %	2.45308	2.40977	0.0385465	0.0222812			0.315544	0.425731	0.433595	0.443084
11	1	2	2	1	2			2.39703
12	1	2	2	1	3			2.37921
13	1	2	2	2	1		Drought + 0.5 Tu	2.72148	2.88007	0.503351	0.290954
14	1	2	2	2	2			2.47511
15	1	2	2	2	3			3.44362
16	1	2	2	3	1		Drought + 0.75 Tu	3.52503	3.77034	0.736515	0.425731
17	1	2	2	3	2			3.18778
18	1	2	2	3	3			4.59821
19	Red-Potato 2	1	1	1	1		control	2.39809	3.36093	0.837633	0.484181
20	2	1	1	1	2			3.76276
21	2	1	1	1	3			3.92194
22	2	1	1	2	1		Thiourea 0.5 rooting media	2.72347	4.04508	1.15635	0.668412
23	2	1	1	2	2			4.8707
24	2	1	1	2	3			4.54107
25	2	1	1	3	1		Thiourea 0.75 mM	4.30682	4.64227	0.75012	0.433595
26	2	1	1	3	2			4.11842
27	2	1	1	3	3			5.50158
28	2	2	2	1	1		Drought 65 %	2.45308	2.07644	0.604466	0.349402
29	2	2	2	1	2			2.39703
30	2	2	2	1	3			1.37921
31	2	2	2	2	1		Drought + 0.5 Tu	2.72148	2.54674	0.15215	0.0879481
32	2	2	2	2	2			2.47511
33	2	2	2	2	3			2.44361
34	2	2	2	3	1		Drought + 0.75 Tu	2.52503	3.00368	0.766535	0.443084
35	2	2	2	3	2			3.88779
36	2	2	2	3	3			2.59821

[truncated: 16 more sheets: Total chlorophyll, Carotenoids , MDA, H2O2, Phenolics , Proline (2), Total soluble proteins , Anthocyanins , Total soluble sugars , Relative membrane permeability, CAT, POD, SOD, sd, graphes, Total soluble sugars1]
